# Supplementary material for: Effectiveness Of Mindfulness Interventions in Reducing Perceived Stress Among Nurses and Nursing Students: A Systematic Review and Meta-Analysis
Source: Research Square preprint supplement (doi:10.21203/rs.3.rs-7328822/v1), 2025-09-09
Supplement: Supplementary file 1 [file 5ebd56ed471a17a513a058a2.docx]

**Mindfulness Intervention Studies**

| **Author, Year,**  **Country** | **Study Design** | **Sample Size (I/C)** | **Mean Age (I/C)** | **Participants** | **Control Type*** | **Female (%) (I/C)** | **Intervention** | **Duration (Weeks)** | **PSS Scale** |
| --- | --- | --- | --- | --- | --- | --- | --- | --- | --- |
| Alhawatmeh, 2022, Jordan(Alhawatmeh et al., 2022) | RCT | 56/56 | 19.7/19.9 | Undergraduate nursing students | Active controls  (Seated with eyes closed with the same duration of the intervention group) | 66/52 | Mindfulness meditation: ABC mindfulness meditation, five 30-minute weekly sessions following Smith’s (2005) protocol, preceded by a 3-hour educational workshop.  Controls: Sitting with eyes closed, matched to experimental group timing | 5 | PSS-10 |
| Anderson, 2021, UK(Anderson, 2021) | One sample pre-post | 20/- | 35.4/- | Registered nurses | - | 87/- | MBSR program (Zenways Zen meditation), including 2 face-to-face sessions and 6 weeks of online training. | 6 | PSS-10 |
| Bazarko, 2013, USA(Bazarko et al., 2013) | One sample pre-post | 36/- | 52.2/- | Mixed full and part-time, with and without patient contacts | - | 100/- | Telephonic MBSR (tMBSR), scalable delivery with meditation sessions and follow-ups for telecommuting nurses. | 8 | PSS-14 |
| Bluth, 2021, USA(Bluth et al., 2021) | One sample pre-post | 30/- | 48.7/- | Certified nurses assistants | - | 97/- | Mindful Self-Compassion (20-hour MSC program) and Self-Compassion for Health Care Communities (6-hour SCHC program) with guided meditation and skill-building. | 8 | PSS-10 |
| Burger, 2017, USA(Burger et al., 2021) | RCT | 28/24 | 18-40 | Nursing students | Passive controls | NA | Online mindfulness meditation instruction with audio guidance; 10-minute daily meditation.  Controls: No meditation practice; training offered post-study. | 4 | PSS-10 |
| Burner, 2022, USA(Burner et al., 2022) | One sample pre-post | 58/- | 22.8/- | Nursing students | - | 84/- | Four in-class mindfulness sessions (10–30 minutes) with practices including mindful eating, breath awareness, body scan, and visualization; follow-up session and online resources. | 4 | PSS-10 |
| Cepeda-Lopez, 2023, Mexico(Cepeda-Lopez et al., 2023) | One sample pre-post | 188/- | 34.1/- | Nurses | - | 83/- | 12-week online program with 36 micro-practices, collective and individual engagement, and weekly cohesion groups for support. | 12 | PSS-14 |
| Chesak, 2015, USA(Chesak et al., 2015) | RCT | 19/20 | 27.9/28.4 | Registered nurses | Passive controls | 95/95 | 90-minute session on stress and resilience with mind-body approaches, 1-hour follow-up, and biweekly email handouts.  Controls-Lecture on stress, reality shock, and work-life connectedness. | 12 | PSS-14 |
| Chesak, 2020, USA(Chesak et al., 2020) | n-RCT | 23/28 | 22.3/23.1 | Registered nurses with 1 year experience | Passive controls | 91/93 | SMART program integrated into a 9-month nurse residency; 90-minute initial session, seven 60-minute follow-ups, and workbook activities.  Controls: Three-month nurse orientation program; no additional intervention. | 36 | PSS-14 |
| Conelius, 2021, USA(Conelius et al., 2021) | One sample pre-post | 25/- | 34/- | Nursing students | - | 100/- | 14-week mindfulness program; conscious breathing, guided imagery, and yoga applied to clinical practice. | 14 | PSS-10 |
| Coster, 2020, UK(Coster et al., 2020) | RCT | 22/14 | 18-65/- | Nursing students | Passive controls | 92/89 | Five-module online mindfulness and compassion program with formal (10–20 min) and informal practices; weekly modules tailored for nursing challenges.  Controls: Wait-list control; intervention made accessible after 20 weeks | 20 | PSS-10 |
| Dos Santos, 2016, Brazil(dos Santos, 2020) | One sample pre-post | 13/- | 47.4/- | Nurses | - | 92/- | Stress Reduction Program (SRP) with 24 group sessions (60 min each) incorporating attention training, body scan, mindfulness of breathing, informal mindfulness, and loving-kindness meditation. | 6 | PSS-10 |
| Drew, 2016, USA(Drew et al., 2016) | n-RCT | 50/64 | 26.9/29.7 | Nursing students | Passive controls | 76/88 | Weekly 1-hour self-care module with yoga, mindful breathing, Reiki, and essential oil therapy taught by Urban Zen Integrative Therapists.  Controls: Pamphlet on stress management | 15 | PSS-14 |
| Dyess, 2018, USA(Dyess et al., 2018) | One sample pre-post | 22/- | 47.8/- | Nurse leaders | - | 86/- | Daily simple meditation practice following Schmidt’s framework, supported by a 2-hour session, weekly messages. | 12 | PSS-14 |
| Fadzil, 2021, Malaysia(Fadzil et al., 2021) | One sample pre-post | 35/- | 34.6/- | Nurses with 3 years experience | - | 94/- | 1-day MINDFULGym mindfulness workshop with monthly 1-hour supervised practice sessions for 3 months, WhatsApp support, and home practice. | 12 | PSS-10 |
| Ficarra, 2023, USA(Ficarra, 2023) | One sample pre-post | 12/- | NA | Licensed and registered nurses | - | NA | Asynchronous MBI with weekly guided meditations (10–20 min), informal mindfulness practices, and weekly guidance via email. | 4 | PSS-10 |
| Fong, 2022, China(Fong et al., 2022) | RCT | 39/38 | 21-50 | Clinical nurses | Passive controls | 92/95 | Mindful coloring - Mandala coloring for at least 5 days during a 10-day period, with no fixed time requirement.  Controls: Wait-list control; coloring activity conducted after 10 days. | 1 | PSS-10 |
| Frogeli, 2015, Sweden(Frögéli et al., 2016) | RCT | 69/44 | NA | Nursing students | Active controls  (Training on personal and professional development) | NA | Six 2-hour group sessions integrating ACT techniques, stress education, and mindfulness practice tailored to nursing education.  Controls: Two 3-hour reflection seminars on personal and professional development. | 6 | PSS-14 |
| Gherardi, 2023, Canada(Gherardi‐Donato et al., 2023) | One sample pre-post | 44/- | 33.8/- | Nurses | - | 84/- | Online MBSR-based program with 2-hour weekly sessions, guided practices, and daily home practice with support materials. | 8 | PSS-14 |
| Graham, 2022, USA(Graham et al., 2022) | RCT | 25/25 | 33/? | Nurses | Active controls  (Music listening) | NA | Online stress management program with guided meditations (5–20 min), daily tips, and weekly e-coaching.  Controls: Relaxing music recordings; instructed to listen daily for 5 minutes for 6 weeks | 6 | PSS-10 |
| Janzarik 2022, Germany(Janzarik et al., 2022) | RCT | 31/33 | 47.4/46.5 | Nurses | Passive controls | 92/91 | Group training combining psychodynamic therapy, CBT techniques, mindfulness exercises, and resilience-building strategies.  Controls: Wait-list control; received intervention after six months (t3) | 8 | PSS-10 |
| Kulka 2018, USA(Kulka et al., 2018) | One sample pre-post | 67/- | NA | Nurses | - | NA | MBSR | 8 | PSS-10 |
| Lin 2019, USA(Lin Lin et al., 2019) | RCT | 44/46 | 32.9/30.2 | Nurses | Passive controls | 98/89 | Modified MBSR/MBCT group program with 2-hour weekly sessions and 20 minutes of daily home practice.  Controls: No intervention; offered MBSR program post-study. | 8 | PSS-14 |
| Magtibay 2017, USA(Magtibay et al., 2017) | One sample pre-post | 50/- | 24-36 | Nurses and nursing leaders | - | 92/- | 12-module web-based Stress Management and Resiliency Training (SMART) with in-person and telephone discussion sessions. | 8 | PSS-14 |
| Mahon 2017, Ireland(Mahon et al., 2017) | One sample pre-post | 64/- | 44.2/- | Nurses | - | 99/- | MBSR | 8 | PSS-10 |
| McNulty 2020, USA(McNulty, 2021) | n-RCT | 131/69 | 27.2/26.2 | Nurses | Passive controls | 82/87 | MBSR  Controls: Standard nurse residency program curriculum without mindfulness training. | 16 | PSS-14 |
| Montanari 2019, USA(Montanari et al., 2019) | One sample pre-post | 26/- | 31.0/- | Registered nurses | - | 92/- | "Mindful Moment" menu with guided audio sessions, journaling prompts, mindfulness resources, and stress-reducing physical space. | 6 | PSS-10 |
| Öztürk 2023(Öztürk, 2023) | RCT | 29/30 | 19.4/19.1 | Nursing students | Passive controls | 83/67 | Mindfulness-based psychoeducation program with 90-minute sessions twice weekly.  Controls: No intervention | 4 | PSS-14 |
| Pan C 2019, USA(Pan et al., 2019) | One sample pre-post | 19/- | 27.7/- | Nurses | - | 95/- | Mindful Living With Stress intervention with 2-hour group sessions, focusing on mindfulness practices, discussions, and homework. | 8 | PSS-14 |
| Plummer 2018, USA(Plummer et al., 2018) | RCT | 36/58 | 23/23 | Nursing students | Passive controls | 89/95 | MBI curriculum integrated into clinical training with 1.5-hour weekly sessions in 4 modules.  Controls: No mindfulness training; standard nursing program curriculum. | 20 | PSS-14 |
| Pratt 2023, USA(Pratt et al., 2022) | RCT | 69/33 | 27/26 | Nurses | Passive controls | 94/94 | Mobile mindfulness program (Lift) with daily content, reminders, and distress monitoring.  Controls: Wait-list control; access to intervention app after study completion. | 4 | PSS-4 |
| Ratanasiripong 2015, USA(Ratanasiripong et al., 2015) | RCT | 29/31 | 19.27/19.27 | Nursing students | Passive controls | NA | Vipassana meditation training with practice 3 times daily for 4 weeks.  Control: No intervention | 4 | PSS-10 |
| Sawyer 2021, USA(Sawyer et al., 2021) | RCT | 33/42 | >18 | Registered nurses | Passive controls | 88/88 | RISE - Resilience, Insight, Self-compassion, Empowerment program with 90-minute sessions combining mindfulness, ACT, CBT, and group support.  Control: Wait-list control | 8 | PSS-14 |
| Sawyer 2023, USA(Sawyer et al., 2023) | RCT | 34/34 | 43.9/44.8 | Registered nurses | Passive controls | 82/92 | Virtual mindfulness-based program with ACT, CBT, and themes of resilience, insight, self-compassion, and empowerment.  Control: Wait-list control | 9 | PSS-14 |
| Spadaro 2016, USA(Spadaro et al., 2016) | One sample pre-post | 26/- | 18-25 | Nursing students | - | NA | Online MBSR-based program with weekly components, guided exercises, and discussion forums. | 8 | PSS-10 |
| Wright 2018, USA(Wright et al., 2018) | One sample pre-post | 10/- | 40/- | Nurses | - | 100/- | Web-based modules integrating yoga, meditation, and MBSR with daily interactive content. | 4 | PSS-10 |

* Active controls were defined as structured comparators involving stress-reduction activities such as music therapy, journaling, or psychoeducation. Passive controls included waitlist, usual care, or no intervention.

References:

1. Alhawatmeh, H. N., Rababa, M., Alfaqih, M., Albataineh, R., Hweidi, I., & Abu Awwad, A. (2022). The Benefits of Mindfulness Meditation on Trait Mindfulness, Perceived Stress, Cortisol, and C-Reactive Protein in Nursing Students: A Randomized Controlled Trial. *Advances in Medical Education and Practice*, *Volume 13*, 47–58. https://doi.org/10.2147/AMEP.S348062
2. Anderson, N. (2021). An evaluation of a mindfulness‐based stress reduction intervention for critical care nursing staff: A quality improvement project. *Nursing in Critical Care*, *26*(6), 441–448. https://doi.org/10.1111/nicc.12552
3. Bazarko, D., Rebecca A. Cate, Rebecca A. Cate, Cate, R. A., Francisca Azocar, Azocar, F., Francisca Azocar, Mary Jo Kreitzer, & Kreitzer, M. J. (2013). The Impact of an Innovative Mindfulness-Based Stress Reduction Program on the Health and Well-Being of Nurses Employed in a Corporate Setting. *Journal of Workplace Behavioral Health*, *28*(2), 107–133. https://doi.org/10.1080/15555240.2013.779518
4. Bluth, K., Christine Lathren, Lathren, C., Silbersack, J., Johanna Hickey, Hickey, J. V. T. S., Sheryl Zimmerman, Zimmerman, S., Christopher J. Wretman, Wretman, C. J., Philip D. Sloane, & Sloane, P. D. (2021). Self-compassion training for certified nurse assistants in nursing homes. *Journal of the American Geriatrics Society*, *69*(7), 1896–1905. https://doi.org/10.1111/jgs.17155
5. Burger, M., Gubler, M., Heinimann, A., & Brönnimann, S. (2021). Modelling the spatial pattern of heatwaves in the city of Bern using a land use regression approach. *Urban Climate*, *38*. Scopus. https://doi.org/10.1016/j.uclim.2021.100885
6. Burner, L. R., Lindsay Burner, Kathleen C. Spadaro, & Kathleen C. Spadaro. (2022). Self-Care Skills to Prevent Burnout: A Pilot Study Embedding Mindfulness in an Undergraduate Nursing Course. *Journal of Holistic Nursing*, 089801012211173–089801012211173. https://doi.org/10.1177/08980101221117367
7. Cepeda-Lopez, A. C., Solís Domínguez, L., Villarreal Zambrano, S., Garza-Rodriguez, I. Y., Del Valle, A. C., & Quiroga-Garza, A. (2023). A comparative study of well-being, resilience, mindfulness, negative emotions, stress, and burnout among nurses after an online mind–body based intervention during the first COVID-19 pandemic crisis. *Frontiers in Psychology*, *14*, 848637. https://doi.org/10.3389/fpsyg.2023.848637
8. Chesak, S. S., Chesak, S. S., Anjali Bhagra, Bhagra, A., Darrell R. Schroeder, Schroeder, D. R., Denise Foy, Foy, D. A., Susanne M. Cutshall, Cutshall, S. M., Amit Sood, & Sood, A. (2015). Enhancing resilience among new nurses: Feasibility and efficacy of a pilot intervention. *The Ochsner Journal*, *15*(1), 38–44.
9. Chesak, S. S., Chesak, S. S., Karen H. Morin, Karen H. Morin, Morin, K. H., Susanne M. Cutshall, Cutshall, S. M., Sarah M. Jenkins, Jenkins, S. M., Amit Sood, Sood, A., & Amit Sood. (2020). Feasibility and efficacy of integrating resiliency training into a pilot nurse residency program. *Nurse Education in Practice*, *50*, 102959. https://doi.org/10.1016/j.nepr.2020.102959
10. Conelius, J., Conelius, J., Rose Iannino-Renz, & Iannino-Renz, R. (2021). Incorporating a Mindfulness Program in a Graduate Family Nurse Practitioner Program. *Journal of Holistic Nursing*, 898010121997303. https://doi.org/10.1177/0898010121997303
11. Coster, S., Coster, S., Rebecca L. Gould, Gould, R. L., Mark Coulson, Coulson, M., Ian Norman, & Norman, I. (2020). *An online mindfulness intervention to enhance compassion in nursing practice: A feasibility and acceptability study with nursing students*. *2*, 100004. https://doi.org/10.1016/j.ijnsa.2020.100004
12. dos Santos, R. S. (2020). Estimating spatio-temporal air temperature in London (UK) using machine learning and earth observation satellite data. *International Journal of Applied Earth Observation and Geoinformation*, *88*. Scopus. https://doi.org/10.1016/j.jag.2020.102066
13. Drew, B. L., Drew, B. L., Drew, B. L., Tracey Motter, Motter, T., Ratchneewan Ross, Ross, R., Ross, R., Laura Goliat, Goliat, L., Patricia A. Sharpnack, Sharpnack, P. A., Amy L. Govoni, Govoni, A. L., Michelle Cameron Bozeman, Bozeman, M. C., Jehad A. Rababah, & Rababah, J. A. (2016). Care for the Caregiver: Evaluation of Mind-Body Self-Care for Accelerated Nursing Students. *Holistic Nursing Practice*, *30*(3), 148–154. https://doi.org/10.1097/hnp.0000000000000140
14. Dyess, S., Dyess, S., Angela S. Prestia, Angela S. Prestia, Angela S. Prestia, Prestia, A. S., Doren-Elyse Marquit, Marquit, D.-E., David Newman, & Newman, D. (2018). Self-Care for Nurse Leaders in Acute Care Environment Reduces Perceived Stress: A Mixed-Methods Pilot Study Merits Further Investigation. *Journal of Holistic Nursing*, *36*(1). https://doi.org/10.1177/0898010116685655
15. Fadzil, N. A., Wei Ooi, H., Yee Cheng, K., & Cheng Kar, P. (2021). The Effect of a Mindfulness-Based Intervention on Nurses in Kelantan, Malaysia. *Malaysian Journal of Medical Sciences*, *28*(6), 121–128. https://doi.org/10.21315/mjms2021.28.6.12
16. Ficarra, M. E. (2023). *An Asynchronous Evidence-Based Mindfulness Intervention for Professional Nurses*. https://doi.org/10.1177/08980101231186033
17. Fong, J. S. Y., Janet Shuk Yan Fong, Anna Na Na Hui, Anna N. N. Hui, Ka Man Ho, Kin-Fai Ho, Albert Kam Ming Chan, Albert Chan, Anna Lee, & Anna Lee. (2022). Brief mindful coloring for stress reduction in nurses working in a Hong Kong hospital during COVID-19 pandemic: A randomized controlled trial. *Medicine*, *101*(43), e31253–e31253. https://doi.org/10.1097/md.0000000000031253
18. Frögéli, E., Frögéli, E., Aleksandar Djordjević, Djordjevic, A., Ann Rudman, Rudman, A., Fredrik Livheim, Livheim, F., Petter Gustavsson, & Gustavsson, P. (2016). A randomized controlled pilot trial of acceptance and commitment training (ACT) for preventing stress-related ill health among future nurses. *Anxiety Stress and Coping*, *29*(2), 202–218. https://doi.org/10.1080/10615806.2015.1025765
19. Gherardi‐Donato, E. C. da S., Díaz‐Serrano, K. V., Marina Rodrigues Barbosa, Maria Neyrian de Fátima Fernandes, Walusa Assad Gonçalves‐Ferri, Elton Brás Camargo Júnior, & Emilene Reisdorfer. (2023). *The Impact of an Online Mindfulness-Based Practice Program on the Mental Health of Brazilian Nurses during the COVID-19 Pandemic*. *20*(4), 3666–3666. https://doi.org/10.3390/ijerph20043666
20. Graham, B., Brett Graham, Yuxuan Jin, Yuxuan Jin, Peter Bazeley, Peter Bazeley, Elaine Husni, Elaine Husni, Leonard H. Calabrese, & Leonard H. Calabrese. (2022). Online, low-volume meditation does not alter immune-related biomarkers. *Brain, Behavior, & Immunity - Health*, 100531–100531. https://doi.org/10.1016/j.bbih.2022.100531
21. Janzarik, G., Gesche Janzarik, Wollschläger, D., Daniel Wollschläger, Michèle Wessa, Michèle Wessa, Klaus Lieb, & Klaus Lieb. (2022). A Group Intervention to Promote Resilience in Nursing Professionals: A Randomised Controlled Trial. *International Journal of Environmental Research and Public Health*, *19*(2). https://doi.org/10.3390/ijerph19020649
22. Kulka, J. M., Kulka, J. M., Jennie C. De Gagné, De Gagne, J. C., Cydney K Mullen, Mullen, C. K., Karen Robeano, & Robeano, K. (2018). Mindfulness-Based Stress Reduction for Newly Graduated Registered Nurses. *Creative Nursing*, *24*(4), 243–250. https://doi.org/10.1891/1078-4535.24.4.243
23. Lin Lin, Lin, L., Guoping He, He, G., Jin Yan, Yan, J., Can Gu, Gu, C., Jianfei Xie, Jianfei Xie, & Xie, J. (2019). The Effects of a Modified Mindfulness-Based Stress Reduction Program for Nurses: A Randomized Controlled Trial. *AAOHN Journal*, *67*(3), 111–122. https://doi.org/10.1177/2165079918801633
24. Magtibay, D. L., Magtibay, D. L., Magtibay, D. L., Sherry S. Chesak, Chesak, S. S., Kevin Coughlin, Coughlin, K., Amit Sood, & Sood, A. (2017). Decreasing Stress and Burnout in Nurses: Efficacy of Blended Learning With Stress Management and Resilience Training Program. *Journal of Nursing Administration*, *47*, 391–395. https://doi.org/10.1097/nna.0000000000000501
25. Mahon, M. A., Mahon, M., Marie Ann Mahon, Lorraine Mee, Mee, L., Denise Brett, Brett, D., Maura Dowling, & Dowling, M. (2017). Nurses’ perceived stress and compassion following a mindfulness meditation and self compassion training. *Journal of Research in Nursing*, *22*(8), 572–583. https://doi.org/10.1177/1744987117721596
26. McNulty, D. S. (2021). Creating a Model for Mindfulness in Nursing Professional Development Using Concept Analysis. *Journal for Nurses in Professional Development*, *Publish Ahead of Print*. https://doi.org/10.1097/NND.0000000000000725
27. Montanari, K. M., Montanari, K. M., Cassandra L Bowe, Bowe, C. L., Sherry S. Chesak, Chesak, S. S., Susanne M. Cutshall, & Cutshall, S. M. (2019). Mindfulness: Assessing the Feasibility of a Pilot Intervention to Reduce Stress and Burnout: *Journal of Holistic Nursing*, *37*(2), 175–188. https://doi.org/10.1177/0898010118793465
28. Öztürk, Ş. (2023). *The effect of a distance-delivered mindfulness-based psychoeducation program on the psychological well-being, emotional intelligence and stress levels of nursing students in Turkey: A randomized controlled study*. https://doi.org/10.1093/her/cyad040
29. Pan, C., Pan, C., Honghong Wang, Wang, H., Minzhen Chen, Chen, M., Yu Cai, Cai, Y., Changgen Xiao, Xiao, C., Qiuping Tang, Tang, Q., Deborah Koniak‐Griffin, Koniak-Griffin, D., & Deborah Koniak-Griffin. (2019). Mindfulness-Based Intervention For Nurses In AIDS Care In China: A Pilot Study. *Neuropsychiatric Disease and Treatment*, *15*, 3131–3141. https://doi.org/10.2147/ndt.s223036
30. Plummer, C., Carrie Plummer, Plummer, C. E., Eydie Cloyd, Cloyd, E., Jennifer K. Doersam, Doersam, J. K., Mary S. Dietrich, Dietrich, M. S., Karen Hande, Hande, K., & Hande, K. A. (2018). Mindfulness in a Graduate Nursing Curriculum: A Randomized Controlled Study. *Holistic Nursing Practice*, *32*(4), 189–195. https://doi.org/10.1097/hnp.0000000000000277
31. Pratt, E. H., Cox, C. E., Olsen, M. K., Parish, A., & Jan, A. (2022). Mobile Mindfulness Intervention to Reduce Emotional Distress and Burnout in Frontline Healthcare Workers: The LIFT-HCW Pilot RCT. *Am. J. Respir. Crit. Care Med.*, *205*(1). https://doi.org/10.1164/ajrccm-conference.2022.205.1_MeetingAbstracts.A1537
32. Ratanasiripong, P., Ratanasiripong, P., Janet F Park, Park, J. F., Nop Ratanasiripong, Ratanasiripong, N. T., Duangrat Kathalae, & Kathalae, D. (2015). Stress and Anxiety Management in Nursing Students: Biofeedback and Mindfulness Meditation. *Journal of Nursing Education*, *54*(9), 520–524. https://doi.org/10.3928/01484834-20150814-07
33. Sawyer, A. T., Hong Tao, & Alison L. Bailey. (2023). *The Impact of a Psychoeducational Group Program on the Mental Well-Being of Unit-Based Nurse Leaders: A Randomized Controlled Trial*. *20*(11), 6035–6035. https://doi.org/10.3390/ijerph20116035
34. Sawyer, A. T., Sawyer, A. T., Alison L. Bailey, Bailey, A. K., Jeanette Green, Green, J. F., Jingwei Sun, Sun, J., Patricia Robinson, & Robinson, P. S. (2021). Resilience, Insight, Self-Compassion, and Empowerment (RISE): A Randomized Controlled Trial of a Psychoeducational Group Program for Nurses. *Journal of the American Psychiatric Nurses Association*, 10783903211033338. https://doi.org/10.1177/10783903211033338
35. Spadaro, K. C., Spadaro, K. C., Diane F. Hunker, & Hunker, D. F. (2016). Exploring The effects Of An online asynchronous mindfulness meditation intervention with nursing students On Stress, mood, And Cognition: A descriptive study. *Nurse Education Today*, *39*, 163–169. https://doi.org/10.1016/j.nedt.2016.02.006
36. Wright, E. M., Wright, E. M., & Erin M. Wright. (2018). Evaluation of a Web-Based Holistic Stress Reduction Pilot Program Among Nurse-Midwives. *Journal of Holistic Nursing*, *36*(2), 159–169. https://doi.org/10.1177/0898010117704325
